# Supplementary material for: The unreliability of egocentric bias across self–other and memory–belief distinctions in the Sandbox Task
Source: R Soc Open Sci. 2018 Nov 7;5(11):181355. doi: 10.1098/rsos.181355 (PMC6281948; doi:10.1098/rsos.181355)
Supplement: SOM 3 - data for experiment 2 [file rsos181355supp3.xlsx]

## Sheet: Sandbox Data (exp 2)
Order	OwnMemShort	FactRecallShort	OwnMemLong	FactRecallLong	OwnMem	FactRecall
Own Memory first	0.00548887	-0.0297563	-0.027768	-0.0261222	-0.0111396	-0.0279392
Own Memory first	0.169872	0.280175	-0.0234872	0.0817546	0.0731926	0.180965
Own Memory first	-0.00564126	0.248497	-0.0269118	0.143398	-0.0162765	0.195948
Own Memory first	0.0123025	0.0841038	-0.0104957	-0.114165	0.000903398	-0.0150308
Own Memory first	0.000351886	-0.00920834	0.0210334	0.233296	0.0106926	0.112044
Own Memory first	-0.0107558	0.00531125	0.024329	0.231639	0.0067866	0.118475
Own Memory first	0.0131944	0.055004	-0.0603022	-0.0124235	-0.0235539	0.0212902
Own Memory first	-0.0151191	0.0114347	-0.0554975	-0.0343955	-0.0353083	-0.0114804
Own Memory first	0.036968	-0.232839	-0.0442184	0.216839	-0.0036252	-0.00799976
Own Memory first	0.00703796	0.00637561	0.0131491	-0.0248128	0.0100935	-0.0092186
Own Memory first	0.0628519	-0.00407135	-0.0140694	0.139118	0.0243913	0.0675231
Own Memory first	-0.210356	0.08755	-0.03992	-0.0407767	-0.125138	0.0233866
Own Memory first	0.0174752	0.0190451	-0.00122689	-0.030403	0.00812414	-0.00567895
Own Memory first	0.220541	0.10297	-0.00993718	0.307025	0.105302	0.204997
Own Memory first	-0.0183567	0.0936379	0.246187	0.160628	0.113915	0.127133
Own Memory first	0.0774067	0.249353	0.217951	0.43535	0.147679	0.342352
Own Memory first	0.0799752	0.311853	0.00647859	-0.00728654	0.0432269	0.152283
Own Memory first	0.0192271	0.0292975	-0.0270702	0.219646	-0.00392157	0.124472
Own Memory first	0.280506	-0.236265	0.234209	0.433809	0.257358	0.0987721
Own Memory first	0.0165809	-0.0279897	-0.0104957	0.0278768	0.00304259	-5.64912e-05
Own Memory first	0.0210217	0.0601292	-0.000801013	0.104821	0.0101104	0.0824751
Own Memory first	0.00973551	0.0421757	-0.00193898	0.129702	0.00389826	0.0859389
Own Memory first	-0.0279142	0.00281459	0.00319508	-0.0662476	-0.0123596	-0.0317165
Own Memory first	0.0516636	0.0370416	-0.0241866	-0.0551238	0.0137385	-0.00904109
Own Memory first	0.0200036	-0.0237114	0.194866	0.228961	0.107435	0.102625
Own Memory first	0.0191875	0.0892506	0.222232	-0.0458139	0.12071	0.0217183
Own Memory first	-0.0227646	-0.000646695	-0.0251995	-0.00300572	-0.023982	-0.00182621
Own Memory first	0.0123025	0.0755471	0.00319508	-0.0405773	0.00774881	0.0174849
Own Memory first	-0.0142029	-0.0134892	-0.0551652	-0.025266	-0.0346841	-0.0193776
Own Memory first	0.0235104	0.225471	-0.0176471	-0.0407767	0.00293166	0.0923472
Fact Recall first	0.01058	0.061804	0.225434	-0.0520787	0.118007	0.00486267
Fact Recall first	0.0481439	-0.114411	-0.0553398	-0.00651057	-0.00359794	-0.0604607
Fact Recall first	0.0755617	-0.00901896	0.152838	0.0516283	0.1142	0.0213047
Fact Recall first	0.0233259	0.0183313	-0.0107112	0.22052	0.00630735	0.119426
Fact Recall first	0.0121958	0.0928176	0.0449395	0.232506	0.0285676	0.162662
Fact Recall first	-0.0391741	0.073982	0.094597	0.00391009	0.0277115	0.0389461
Fact Recall first	-0.0152484	0.0406434	-0.0990291	-0.0125071	-0.0571388	0.0140682
Fact Recall first	0.0138778	0.0320769	-0.0270702	0.0166191	-0.00659623	0.024348
Fact Recall first	0.24336	-0.204271	0.0295285	0.216239	0.136444	0.00598373
Fact Recall first	0.0712711	0.0123382	-0.092903	0.024458	-0.0108159	0.0183981
Fact Recall first	-0.00779481	0.00055452	-0.0173088	0.0519181	-0.0125518	0.0262363
Fact Recall first	0.00606352	-0.0347156	-0.0127585	0.205005	-0.00334752	0.0851447
Fact Recall first	-0.15831	0.0869027	-0.0664763	0.289891	-0.112393	0.188397
Fact Recall first	-0.0331809	-0.000504278	0.277816	-0.0183502	0.122318	-0.00942723
Fact Recall first	0.042204	0.0506929	0.0741515	0.0154427	0.0581777	0.0330678
Fact Recall first	0.0430314	0.0345501	-0.0345876	-0.0729601	0.00422189	-0.019205
Fact Recall first	-0.0710097	-0.000447527	-0.0143051	-0.0118003	-0.0426574	-0.0061239
Fact Recall first	0.218791	0.219135	0.400704	0.523213	0.309748	0.371174
Fact Recall first	-0.191424	-0.0570072	-0.0790827	-0.0190525	-0.135253	-0.0380299
Fact Recall first	0.055004	0.00292038	0.217885	-0.0406105	0.136444	-0.018845
Fact Recall first	0.159456	-0.134066	-0.0192728	0.187129	0.0700916	0.0265317
Fact Recall first	0.0113396	-0.00221661	0.00213127	-0.0157817	0.00673544	-0.00899915
Fact Recall first	0.106351	-0.134018	0.105743	-0.00193898	0.106047	-0.0679785
Fact Recall first	0.0584335	0.0285604	-0.0499898	-0.036166	0.00422189	-0.00380282
